# Supplementary material for: Lack of strong innate immune reactivity renders macrophages alone unable to control productive Varicella-Zoster Virus infection in an isogenic human iPSC-derived neuronal co-culture model
Source: Front Immunol. 2023 May 23;14:1177245. doi: 10.3389/fimmu.2023.1177245 (PMC10241998; doi:10.3389/fimmu.2023.1177245)
Supplement: Supplementary File 3 — DEG and pathway analysis hiPSC-macrophages. [file DataSheet_3.xlsx]

## Sheet: DEG lipo control vs. lipo pdAT
ensembl_gene_id_version	ensembl_gene_id	uniprot_gn_symbol	uniprot_gn_id	description	baseMean	log2FoldChange	lfcSE	stat	pvalue	padj
ENSG00000130303.14	ENSG00000130303	BST2	Q10589	bone marrow stromal cell antigen 2 [Source:HGNC Symbol;Acc:HGNC:1119]	111.095	6.57649	0.892292	7.37033	1.70206e-13	2.42355e-10
ENSG00000137965.11	ENSG00000137965	IFI44	Q8TCB0	interferon induced protein 44 [Source:HGNC Symbol;Acc:HGNC:16938]	47.4637	6.34315	0.831381	7.62966	2.35381e-14	4.30915e-11
ENSG00000245571.7	ENSG00000245571			FAM111A divergent transcript [Source:HGNC Symbol;Acc:HGNC:53752]	4.83022	4.74243	1.04324	4.54585	5.47142e-06	0.00304853
ENSG00000162840.4	ENSG00000162840			metallothionein 2 pseudogene 1 [Source:HGNC Symbol;Acc:HGNC:7407]	4.46743	4.64848	1.02182	4.5492	5.38502e-06	0.00304853
ENSG00000187608.10	ENSG00000187608	ISG15	P05161	ISG15 ubiquitin like modifier [Source:HGNC Symbol;Acc:HGNC:4053]	612.406	4.51106	0.48523	9.29675	1.44802e-20	7.42256e-17
ENSG00000115415.20	ENSG00000115415	STAT1	A0A669KB68	signal transducer and activator of transcription 1 [Source:HGNC Symbol;Acc:HGNC:11362]	931.946	4.41203	0.28583	15.4359	9.3936e-54	2.40758e-49
ENSG00000275202.1	ENSG00000275202			novel transcriptantisense to FNDC3A	2.43781	4.25127	1.1446	3.7142	0.000203848	0.041591
ENSG00000230806.1	ENSG00000230806			SRGAP2 antisense RNA 1 [Source:HGNC Symbol;Acc:HGNC:40902]	2.23871	4.15747	1.10437	3.76458	0.000166831	0.0359316
ENSG00000185507.21	ENSG00000185507	IRF7	Q92985	interferon regulatory factor 7 [Source:HGNC Symbol;Acc:HGNC:6122]	26.4517	3.94963	0.577206	6.84268	7.77268e-12	8.66146e-09
ENSG00000205413.8	ENSG00000205413	SAMD9	Q5K651	sterile alpha motif domain containing 9 [Source:HGNC Symbol;Acc:HGNC:1348]	26.296	3.87958	0.521266	7.44262	9.87079e-14	1.48817e-10
ENSG00000137959.17	ENSG00000137959	IFI44L	Q53G44	interferon induced protein 44 like [Source:HGNC Symbol;Acc:HGNC:17817]	184.964	3.79259	0.472762	8.0222	1.0387e-15	3.32774e-12
ENSG00000125148.7	ENSG00000125148	MT2A	P02795	metallothionein 2A [Source:HGNC Symbol;Acc:HGNC:7406]	733.728	3.65295	0.471505	7.74744	9.37672e-15	2.18478e-11
ENSG00000188313.13	ENSG00000188313	PLSCR1	O15162	phospholipid scramblase 1 [Source:HGNC Symbol;Acc:HGNC:9092]	207.524	3.57099	0.412252	8.66215	4.62931e-18	1.97749e-14
ENSG00000165949.12	ENSG00000165949	IFI27	P40305	interferon alpha inducible protein 27 [Source:HGNC Symbol;Acc:HGNC:5397]	162.314	3.22246	0.570117	5.65229	1.58328e-08	1.22968e-05
ENSG00000130589.16	ENSG00000130589	HELZ2	Q9BYK8	helicase with zinc finger 2 [Source:HGNC Symbol;Acc:HGNC:30021]	148.473	3.15121	0.279237	11.2851	1.55485e-29	1.99254e-25
ENSG00000152778.10	ENSG00000152778	IFIT5	Q13325	interferon induced protein with tetratricopeptide repeats 5 [Source:HGNC Symbol;Acc:HGNC:13328]	198.272	2.97938	0.469603	6.34446	2.2321e-10	2.28835e-07
ENSG00000166710.21	ENSG00000166710	B2M	P61769	beta-2-microglobulin [Source:HGNC Symbol;Acc:HGNC:914]	702.006	2.94814	0.41102	7.17274	7.35095e-13	9.42025e-10
ENSG00000134321.13	ENSG00000134321	RSAD2	Q8WXG1	radical S-adenosyl methionine domain containing 2 [Source:HGNC Symbol;Acc:HGNC:30908]	68.5063	2.90846	0.373992	7.77681	7.43769e-15	1.90628e-11
ENSG00000234745.13	ENSG00000234745	HLA-B	Q5SS57	major histocompatibility complexclass IB [Source:HGNC Symbol;Acc:HGNC:4932]	126.433	2.70299	0.470659	5.74298	9.30238e-09	7.69097e-06
ENSG00000204592.9	ENSG00000204592	HLA-E	P13747	major histocompatibility complexclass IE [Source:HGNC Symbol;Acc:HGNC:4962]	85.4724	2.60852	0.371018	7.03071	2.05479e-12	2.39383e-09
ENSG00000213928.9	ENSG00000213928	IRF9	H0YNM9	interferon regulatory factor 9 [Source:HGNC Symbol;Acc:HGNC:6131]	12.0519	2.59299	0.649503	3.99227	6.5444e-05	0.0199682
ENSG00000132109.10	ENSG00000132109	TRIM21	P19474	tripartite motif containing 21 [Source:HGNC Symbol;Acc:HGNC:11312]	35.477	2.56096	0.338508	7.56543	3.86576e-14	6.60529e-11
ENSG00000110446.12	ENSG00000110446	SLC15A3	F5H1C8	solute carrier family 15 member 3 [Source:HGNC Symbol;Acc:HGNC:18068]	20.8419	2.55515	0.495462	5.15709	2.50813e-07	0.000173739
ENSG00000141574.8	ENSG00000141574	SECTM1	Q8WVN6	secreted and transmembrane 1 [Source:HGNC Symbol;Acc:HGNC:10707]	10.9905	2.42336	0.555958	4.3589	1.3072e-05	0.006443
ENSG00000163840.10	ENSG00000163840	DTX3L	Q8TDB6	deltex E3 ubiquitin ligase 3L [Source:HGNC Symbol;Acc:HGNC:30323]	77.7226	2.38437	0.304962	7.81859	5.34188e-15	1.52125e-11
ENSG00000160932.11	ENSG00000160932	LY6E	E5RGI6	lymphocyte antigen 6 family member E [Source:HGNC Symbol;Acc:HGNC:6727]	24.4664	2.35564	0.412477	5.71096	1.12344e-08	8.99803e-06
ENSG00000204525.17	ENSG00000204525	HLA-C	Q5RIP0	major histocompatibility complexclass IC [Source:HGNC Symbol;Acc:HGNC:4933]	132.796	2.31054	0.341415	6.76755	1.3098e-11	1.39876e-08
ENSG00000102287.19	ENSG00000102287	GABRE	P78334	gamma-aminobutyric acid type A receptor subunit epsilon [Source:HGNC Symbol;Acc:HGNC:4085]	13.6442	2.30624	0.548502	4.20461	2.61534e-05	0.0109322
ENSG00000177409.12	ENSG00000177409	SAMD9L	Q8IVG5	sterile alpha motif domain containing 9 like [Source:HGNC Symbol;Acc:HGNC:1349]	22.5753	2.30072	0.439028	5.24049	1.6015e-07	0.000117276
ENSG00000138646.9	ENSG00000138646	HERC5	Q9UII4	HECT and RLD domain containing E3 ubiquitin protein ligase 5 [Source:HGNC Symbol;Acc:HGNC:24368]	309.013	2.29869	0.207083	11.1003	1.24961e-28	1.06758e-24
ENSG00000117228.11	ENSG00000117228	GBP1	P32455	guanylate binding protein 1 [Source:HGNC Symbol;Acc:HGNC:4182]	49.174	2.27475	0.319047	7.12984	1.00486e-12	1.2264e-09
ENSG00000107140.16	ENSG00000107140	TESK1	Q15569	testis associated actin remodelling kinase 1 [Source:HGNC Symbol;Acc:HGNC:11731]	11.085	2.25532	0.568582	3.96658	7.29116e-05	0.0215715
ENSG00000141682.12	ENSG00000141682	PMAIP1	Q13794	phorbol-12-myristate-13-acetate-induced protein 1 [Source:HGNC Symbol;Acc:HGNC:9108]	15.8916	2.20323	0.544848	4.04376	5.26017e-05	0.0170656
ENSG00000157601.15	ENSG00000157601	MX1	P20591	MX dynamin like GTPase 1 [Source:HGNC Symbol;Acc:HGNC:7532]	147.613	2.18954	0.226096	9.68412	3.52223e-22	2.25687e-18
ENSG00000162692.12	ENSG00000162692	VCAM1	P19320	vascular cell adhesion molecule 1 [Source:HGNC Symbol;Acc:HGNC:12663]	44.8306	2.16922	0.373222	5.81215	6.1676e-09	5.26918e-06
ENSG00000163565.19	ENSG00000163565	IFI16	Q16666	interferon gamma inducible protein 16 [Source:HGNC Symbol;Acc:HGNC:5395]	226.625	2.16885	0.291165	7.44885	9.41552e-14	1.48817e-10
ENSG00000221963.6	ENSG00000221963	APOL6	Q9BWW8	apolipoprotein L6 [Source:HGNC Symbol;Acc:HGNC:14870]	78.8468	2.07499	0.351017	5.91136	3.39299e-09	3.1058e-06
ENSG00000128335.14	ENSG00000128335	APOL2	A0A024R1M8	apolipoprotein L2 [Source:HGNC Symbol;Acc:HGNC:619]	42.3971	2.03046	0.264689	7.67112	1.70501e-14	3.36149e-11
ENSG00000239319.3	ENSG00000239319			RNA7SLcytoplasmic 854pseudogene [Source:HGNC Symbol;Acc:HGNC:46870]	13.1534	2.0273	0.505356	4.01163	6.03019e-05	0.0192395
ENSG00000115267.9	ENSG00000115267	IFIH1	Q9BYX4	interferon induced with helicase C domain 1 [Source:HGNC Symbol;Acc:HGNC:18873]	50.8242	2.02149	0.248136	8.1467	3.73998e-16	1.36937e-12
ENSG00000133321.11	ENSG00000133321	PLAAT4	Q9UL19	phospholipase A and acyltransferase 4 [Source:HGNC Symbol;Acc:HGNC:9869]	30.5034	2.00543	0.466293	4.30078	1.70196e-05	0.00793113
ENSG00000108679.13	ENSG00000108679	LGALS3BP	Q08380	galectin 3 binding protein [Source:HGNC Symbol;Acc:HGNC:6564]	133.15	1.95805	0.445343	4.39673	1.09896e-05	0.00563327
ENSG00000159403.18	ENSG00000159403	C1R	B4DPQ0	complement C1r [Source:HGNC Symbol;Acc:HGNC:1246]	28.4468	1.91731	0.499101	3.84153	0.000122271	0.0295641
ENSG00000213657.3	ENSG00000213657			ribosomal protein L31 pseudogene 44 [Source:HGNC Symbol;Acc:HGNC:35523]	9.16184	1.91016	0.483726	3.94885	7.85281e-05	0.0226143
ENSG00000229068.1	ENSG00000229068			thymopoietin pseudogene 1 [Source:HGNC Symbol;Acc:HGNC:21364]	11.9172	1.87749	0.463468	4.05095	5.10092e-05	0.0170656
ENSG00000272243.6	ENSG00000272243			novel transcript	11.9415	1.78296	0.440866	4.04422	5.24985e-05	0.0170656
ENSG00000201426.1	ENSG00000201426			Y RNA [Source:RFAM;Acc:RF00019]	14.7158	1.7804	0.421161	4.22737	2.36435e-05	0.0102709
ENSG00000173193.15	ENSG00000173193	PARP14	Q460N5	poly(ADP-ribose) polymerase family member 14 [Source:HGNC Symbol;Acc:HGNC:29232]	206.5	1.77898	0.290954	6.1143	9.6983e-10	9.2062e-07
ENSG00000274026.2	ENSG00000274026			family with sequence similarity 27 member E3 [Source:HGNC Symbol;Acc:HGNC:28655]	12.6159	1.70025	0.459491	3.70029	0.000215351	0.0431207
ENSG00000135899.19	ENSG00000135899	SP110	Q9HB58	SP110 nuclear body protein [Source:HGNC Symbol;Acc:HGNC:5401]	45.3733	1.67501	0.324521	5.16146	2.45028e-07	0.000173739
ENSG00000225376.6	ENSG00000225376			TMEM246 antisense RNA 1 [Source:HGNC Symbol;Acc:HGNC:51191]	23.3491	1.50923	0.370338	4.07526	4.59622e-05	0.0161371
ENSG00000055332.19	ENSG00000055332	EIF2AK2	P19525	eukaryotic translation initiation factor 2 alpha kinase 2 [Source:HGNC Symbol;Acc:HGNC:9437]	701.817	1.50357	0.20704	7.26219	3.80863e-13	5.13765e-10
ENSG00000105852.11	ENSG00000105852	PON3	Q15166	paraoxonase 3 [Source:HGNC Symbol;Acc:HGNC:9206]	17.6597	1.43	0.382547	3.73809	0.000185422	0.0392757
ENSG00000287984.1	ENSG00000287984			novel transcript	30.9098	1.38894	0.282195	4.9219	8.57063e-07	0.000578067
ENSG00000183486.14	ENSG00000183486	MX2	P20592	MX dynamin like GTPase 2 [Source:HGNC Symbol;Acc:HGNC:7533]	144.77	1.3683	0.177761	7.69744	1.3882e-14	2.96497e-11
ENSG00000002549.13	ENSG00000002549	LAP3	P28838	leucine aminopeptidase 3 [Source:HGNC Symbol;Acc:HGNC:18449]	66.6978	1.34275	0.274337	4.89453	9.85409e-07	0.000647591
ENSG00000215367.10	ENSG00000215367			transmembrane p24 trafficking protein 11pseudogene [Source:HGNC Symbol;Acc:HGNC:35401]	24.7481	1.2775	0.344021	3.71343	0.000204466	0.041591
ENSG00000188725.8	ENSG00000188725	SMIM15	Q7Z3B0	small integral membrane protein 15 [Source:HGNC Symbol;Acc:HGNC:33861]	45.842	1.22627	0.318094	3.85506	0.000115702	0.0286323
ENSG00000162645.13	ENSG00000162645	GBP2	P32456	guanylate binding protein 2 [Source:HGNC Symbol;Acc:HGNC:4183]	27.0359	1.2232	0.291708	4.19323	2.75011e-05	0.0111882
ENSG00000113068.10	ENSG00000113068	PFDN1	O60925	prefoldin subunit 1 [Source:HGNC Symbol;Acc:HGNC:8866]	185.272	1.21393	0.259532	4.67737	2.90584e-06	0.00177326
ENSG00000210082.2	ENSG00000210082			mitochondrially encoded 16S rRNA [Source:HGNC Symbol;Acc:HGNC:7471]	183244	1.21377	0.274418	4.42306	9.73128e-06	0.00509005
ENSG00000206142.9	ENSG00000206142			family with sequence similarity 230 member H [Source:HGNC Symbol;Acc:HGNC:53977]	48.7231	1.20609	0.261096	4.61932	3.84993e-06	0.00229474
ENSG00000122644.13	ENSG00000122644	ARL4A	P40617	ADP ribosylation factor like GTPase 4A [Source:HGNC Symbol;Acc:HGNC:695]	106.744	1.19392	0.307678	3.88041	0.000104279	0.0269966
ENSG00000274044.5	ENSG00000274044			family with sequence similarity 230 member J [Source:HGNC Symbol;Acc:HGNC:52448]	39.002	1.17727	0.319585	3.68375	0.000229832	0.0439596
ENSG00000134326.12	ENSG00000134326	CMPK2	Q5EBM0	cytidine/uridine monophosphate kinase 2 [Source:HGNC Symbol;Acc:HGNC:27015]	60.7149	1.15745	0.220223	5.25582	1.47362e-07	0.000111085
ENSG00000173821.19	ENSG00000173821	RNF213	A0A0A0MTC1	ring finger protein 213 [Source:HGNC Symbol;Acc:HGNC:14539]	438.367	1.13614	0.237328	4.78723	1.69097e-06	0.00105706
ENSG00000117226.12	ENSG00000117226	GBP3	Q9H0R5	guanylate binding protein 3 [Source:HGNC Symbol;Acc:HGNC:4184]	31.431	1.12574	0.294795	3.81873	0.000134138	0.0312542
ENSG00000126709.16	ENSG00000126709	IFI6	P09912	interferon alpha inducible protein 6 [Source:HGNC Symbol;Acc:HGNC:4054]	62.5555	1.09236	0.281167	3.88509	0.000102291	0.0267522
ENSG00000167528.13	ENSG00000167528	ZNF641	Q96N77	zinc finger protein 641 [Source:HGNC Symbol;Acc:HGNC:31834]	98.0827	1.07698	0.291335	3.69669	0.000218426	0.0433723
ENSG00000151332.19	ENSG00000151332	MBIP	Q9NS73	MAP3K12 binding inhibitory protein 1 [Source:HGNC Symbol;Acc:HGNC:20427]	75.7314	1.0669	0.279886	3.81192	0.00013789	0.0318389
ENSG00000072694.21	ENSG00000072694	FCGR2B	P31994	Fc fragment of IgG receptor IIb [Source:HGNC Symbol;Acc:HGNC:3618]	32.7927	1.05476	0.278416	3.78843	0.000151602	0.0337876
ENSG00000089685.15	ENSG00000089685	BIRC5	A0A0B4J1S3	baculoviral IAP repeat containing 5 [Source:HGNC Symbol;Acc:HGNC:593]	50.9162	1.04439	0.260876	4.0034	6.24391e-05	0.019516
ENSG00000156587.16	ENSG00000156587	UBE2L6	O14933	ubiquitin conjugating enzyme E2 L6 [Source:HGNC Symbol;Acc:HGNC:12490]	142.958	1.00547	0.263118	3.82139	0.000132703	0.0312034
ENSG00000162704.16	ENSG00000162704	ARPC5	O15511	actin related protein 2/3 complex subunit 5 [Source:HGNC Symbol;Acc:HGNC:708]	379.505	0.94839	0.254155	3.73154	0.000190315	0.0399818
ENSG00000286279.1	ENSG00000286279			novel transcript	60.7922	0.923107	0.245189	3.76488	0.000166628	0.0359316
ENSG00000149428.19	ENSG00000149428	HYOU1	Q9Y4L1	hypoxia up-regulated 1 [Source:HGNC Symbol;Acc:HGNC:16931]	135.032	0.896272	0.242803	3.69136	0.000223058	0.0433723
ENSG00000258107.3	ENSG00000258107			novel transcript	53.6678	0.89611	0.220602	4.06211	4.86308e-05	0.0168433
ENSG00000166750.10	ENSG00000166750	SLFN5	Q08AF3	schlafen family member 5 [Source:HGNC Symbol;Acc:HGNC:28286]	165.656	0.881848	0.216319	4.07662	4.56953e-05	0.0161371
ENSG00000121060.19	ENSG00000121060	TRIM25	Q14258	tripartite motif containing 25 [Source:HGNC Symbol;Acc:HGNC:12932]	193.377	0.874851	0.218723	3.99982	6.33909e-05	0.0195748
ENSG00000173786.17	ENSG00000173786	CNP	P09543	2'3'-cyclic nucleotide 3' phosphodiesterase [Source:HGNC Symbol;Acc:HGNC:2158]	260.376	0.870485	0.227369	3.82851	0.00012892	0.0305945
ENSG00000254427.2	ENSG00000254427			long intergenic non-protein coding RNA 2696 [Source:HGNC Symbol;Acc:HGNC:54210]	72.0282	0.848892	0.184077	4.6116	3.99575e-06	0.00232752
ENSG00000173239.14	ENSG00000173239	LIPM	Q5VYY2	lipase family member M [Source:HGNC Symbol;Acc:HGNC:23455]	63.0707	0.843552	0.21546	3.91512	9.03605e-05	0.0249026
ENSG00000137492.9	ENSG00000137492	THAP12	O43422	THAP domain containing 12 [Source:HGNC Symbol;Acc:HGNC:9440]	172.119	0.814241	0.215819	3.77279	0.000161429	0.0353627
ENSG00000247809.9	ENSG00000247809			NR2F2 antisense RNA 1 [Source:HGNC Symbol;Acc:HGNC:44222]	83.0991	0.800481	0.20563	3.89282	9.90876e-05	0.0267328
ENSG00000239828.7	ENSG00000239828			novel transcript	79.8766	0.797553	0.19715	4.04541	5.22327e-05	0.0170656
ENSG00000114450.11	ENSG00000114450	GNB4	Q9HAV0	G protein subunit beta 4 [Source:HGNC Symbol;Acc:HGNC:20731]	339.446	0.76483	0.194296	3.93643	8.27039e-05	0.0230402
ENSG00000196911.11	ENSG00000196911	KPNA5	Q5TD90	karyopherin subunit alpha 5 [Source:HGNC Symbol;Acc:HGNC:6398]	421.064	0.747483	0.198803	3.75992	0.000169971	0.036303
ENSG00000119927.14	ENSG00000119927	GPAM	Q9HCL2	glycerol-3-phosphate acyltransferasemitochondrial [Source:HGNC Symbol;Acc:HGNC:24865]	160.239	0.719658	0.194842	3.69356	0.000221139	0.0433723
ENSG00000122729.19	ENSG00000122729	ACO1	P21399	aconitase 1 [Source:HGNC Symbol;Acc:HGNC:117]	201.736	0.709976	0.194533	3.64964	0.000262608	0.047735
ENSG00000135655.16	ENSG00000135655	USP15	Q9Y4E8	ubiquitin specific peptidase 15 [Source:HGNC Symbol;Acc:HGNC:12613]	401.758	0.708662	0.171926	4.1219	3.75764e-05	0.0145922
ENSG00000131732.12	ENSG00000131732	ZCCHC9	Q8N567	zinc finger CCHC-type containing 9 [Source:HGNC Symbol;Acc:HGNC:25424]	155.769	0.67831	0.165901	4.08864	4.33913e-05	0.0158874
ENSG00000067066.17	ENSG00000067066	SP100	P23497	SP100 nuclear antigen [Source:HGNC Symbol;Acc:HGNC:11206]	170.86	0.657434	0.171522	3.83295	0.000126618	0.0303291
ENSG00000234127.9	ENSG00000234127	TRIM26	A0A024RCP3	tripartite motif containing 26 [Source:HGNC Symbol;Acc:HGNC:12962]	158.029	0.637564	0.153276	4.15957	3.18852e-05	0.012769
ENSG00000106392.11	ENSG00000106392	C1GALT1	Q9NS00	core 1 synthaseglycoprotein-N-acetylgalactosamine 3-beta-galactosyltransferase 1 [Source:HGNC Symbol;Acc:HGNC:24337]	192.745	0.61242	0.143097	4.27977	1.87087e-05	0.00856258
ENSG00000105939.14	ENSG00000105939	ZC3HAV1	Q7Z2W4	zinc finger CCCH-type containingantiviral 1 [Source:HGNC Symbol;Acc:HGNC:23721]	438.949	0.581868	0.149732	3.88606	0.000101885	0.0267522
ENSG00000155313.16	ENSG00000155313	USP25	Q96B65	ubiquitin specific peptidase 25 [Source:HGNC Symbol;Acc:HGNC:12624]	295.959	0.485765	0.112171	4.33057	1.48724e-05	0.00719205
ENSG00000100678.19	ENSG00000100678	SLC8A3	P57103	solute carrier family 8 member A3 [Source:HGNC Symbol;Acc:HGNC:11070]	200.416	0.455774	0.11457	3.97814	6.94578e-05	0.0209436
ENSG00000087495.17	ENSG00000087495	PHACTR3	Q96KR7	phosphatase and actin regulator 3 [Source:HGNC Symbol;Acc:HGNC:15833]	512.179	0.430098	0.117532	3.6594	0.000252811	0.0471895
ENSG00000156273.16	ENSG00000156273	BACH1	O14867	BTB domain and CNC homolog 1 [Source:HGNC Symbol;Acc:HGNC:935]	575.147	0.388152	0.0916655	4.23444	2.29119e-05	0.0101247
ENSG00000253554.7	ENSG00000253554			long intergenic non-protein coding RNA 1414 [Source:HGNC Symbol;Acc:HGNC:50707]	625.275	0.285584	0.0737046	3.8747	0.000106755	0.0273612
ENSG00000113194.13	ENSG00000113194	FAF2	Q96CS3	Fas associated factor family member 2 [Source:HGNC Symbol;Acc:HGNC:24666]	471.143	-0.354655	0.0967215	-3.66677	0.000245635	0.0462913
ENSG00000204084.13	ENSG00000204084	INPP5B	P32019	inositol polyphosphate-5-phosphatase B [Source:HGNC Symbol;Acc:HGNC:6077]	448.747	-0.39599	0.106568	-3.71584	0.000202529	0.041591
ENSG00000142347.19	ENSG00000142347	MYO1F	O00160	myosin IF [Source:HGNC Symbol;Acc:HGNC:7600]	254.353	-0.398931	0.105492	-3.78161	0.000155817	0.0344275
ENSG00000152284.5	ENSG00000152284	TCF7L1	Q9HCS4	transcription factor 7 like 1 [Source:HGNC Symbol;Acc:HGNC:11640]	419.719	-0.427691	0.107926	-3.96283	7.40654e-05	0.0215715
ENSG00000125648.15	ENSG00000125648	SLC25A23	Q9BV35	solute carrier family 25 member 23 [Source:HGNC Symbol;Acc:HGNC:19375]	236.786	-0.428587	0.118031	-3.63115	0.000282161	0.0498744
ENSG00000179832.18	ENSG00000179832	MROH1	Q8NDA8	maestro heat like repeat family member 1 [Source:HGNC Symbol;Acc:HGNC:26958]	497.057	-0.433709	0.110096	-3.93938	8.1694e-05	0.023009
ENSG00000105662.16	ENSG00000105662	CRTC1	Q6UUV9	CREB regulated transcription coactivator 1 [Source:HGNC Symbol;Acc:HGNC:16062]	435.772	-0.466728	0.103838	-4.49479	6.96384e-06	0.0037184
ENSG00000160539.6	ENSG00000160539	PLPP7	Q8NBV4	phospholipid phosphatase 7 (inactive) [Source:HGNC Symbol;Acc:HGNC:28174]	335.017	-0.470974	0.12385	-3.80277	0.000143085	0.0324538
ENSG00000118096.10	ENSG00000118096	C11orf60	A0A024R3G9	intraflagellar transport 46 [Source:HGNC Symbol;Acc:HGNC:26146]	217.196	-0.494604	0.109121	-4.53262	5.82573e-06	0.00317688
ENSG00000167123.19	ENSG00000167123	CERCAM	Q5T4B2	cerebral endothelial cell adhesion molecule [Source:HGNC Symbol;Acc:HGNC:23723]	174.624	-0.529458	0.125553	-4.21701	2.47562e-05	0.010575
ENSG00000170421.12	ENSG00000170421	KRT8	P05787	keratin 8 [Source:HGNC Symbol;Acc:HGNC:6446]	245.676	-0.544122	0.132501	-4.10656	4.01603e-05	0.0153628
ENSG00000130304.17	ENSG00000130304	SLC27A1	Q6PCB7	solute carrier family 27 member 1 [Source:HGNC Symbol;Acc:HGNC:10995]	104.766	-0.561916	0.145799	-3.85404	0.000116183	0.0286323
ENSG00000285966.1	ENSG00000285966			novel transcript	157.979	-0.578487	0.159307	-3.63126	0.000282039	0.0498744
ENSG00000229212.8	ENSG00000229212			golgin subfamily A pseudogene	168.375	-0.580958	0.158008	-3.67677	0.000236206	0.0448441
ENSG00000238198.2	ENSG00000238198			LRIG2 divergent transcript [Source:HGNC Symbol;Acc:HGNC:54312]	91.1372	-0.583118	0.160566	-3.63165	0.000281619	0.0498744
ENSG00000235568.7	ENSG00000235568	NFAM1	Q8NET5	NFAT activating protein with ITAM motif 1 [Source:HGNC Symbol;Acc:HGNC:29872]	160.011	-0.601131	0.155282	-3.87121	0.000108296	0.0274814
ENSG00000236980.10	ENSG00000236980	C3orf84	H3BNL1	chromosome 3 open reading frame 84 [Source:HGNC Symbol;Acc:HGNC:44666]	137.678	-0.605006	0.162787	-3.71655	0.000201962	0.041591
ENSG00000175287.19	ENSG00000175287	PHYHD1	Q5SRE7	phytanoyl-CoA dioxygenase domain containing 1 [Source:HGNC Symbol;Acc:HGNC:23396]	89.2434	-0.652592	0.178759	-3.65069	0.00026154	0.047735
ENSG00000249319.2	ENSG00000249319			novel protein	115.922	-0.676824	0.170705	-3.96489	7.34309e-05	0.0215715
ENSG00000104915.15	ENSG00000104915	STX10	Q5U8S2	syntaxin 10 [Source:HGNC Symbol;Acc:HGNC:11428]	167.763	-0.701554	0.160326	-4.37579	1.20994e-05	0.00608055
ENSG00000130158.14	ENSG00000130158	DOCK6	Q96HP0	dedicator of cytokinesis 6 [Source:HGNC Symbol;Acc:HGNC:19189]	311.387	-0.718004	0.177419	-4.04693	5.18942e-05	0.0170656
ENSG00000215481.9	ENSG00000215481			BCR pseudogene 3 [Source:HGNC Symbol;Acc:HGNC:1016]	155.337	-0.719685	0.195085	-3.68908	0.000225069	0.0433723
ENSG00000235545.1	ENSG00000235545			novel transcript	66.451	-0.772555	0.188361	-4.10147	4.10539e-05	0.0154737
ENSG00000255867.1	ENSG00000255867			DENND5B antisense RNA 1 [Source:HGNC Symbol;Acc:HGNC:42517]	198.031	-0.776575	0.184806	-4.2021	2.64453e-05	0.0109322
ENSG00000277287.1	ENSG00000277287			novel transcript	41.8106	-0.805888	0.200986	-4.00967	6.08036e-05	0.0192395
ENSG00000157335.21	ENSG00000157335	CLEC18C	Q8NCF0	C-type lectin domain family 18 member C [Source:HGNC Symbol;Acc:HGNC:28538]	73.8812	-0.814889	0.199876	-4.07698	4.5624e-05	0.0161371
ENSG00000237301.1	ENSG00000237301			novel transcript	68.1795	-0.850333	0.218625	-3.88947	0.000100465	0.0267522
ENSG00000283566.2	ENSG00000283566			dual specificity mitogen-activated protein kinase kinase 3	37.2898	-0.855731	0.216895	-3.94537	7.9676e-05	0.0226899
ENSG00000241506.1	ENSG00000241506			proteasome 26S subunitATPase 1 pseudogene 1 [Source:HGNC Symbol;Acc:HGNC:30147]	122.389	-0.863207	0.233941	-3.68985	0.000224382	0.0433723
ENSG00000276894.1	ENSG00000276894			RAB28member RAS oncogene family pseudogene 4 [Source:HGNC Symbol;Acc:HGNC:51548]	45.3722	-0.930617	0.254398	-3.65811	0.000254083	0.0471895
ENSG00000286870.1	ENSG00000286870			novel transcript	29.7508	-0.981104	0.254072	-3.86153	0.000112681	0.0283138
ENSG00000227519.1	ENSG00000227519			novel transcript	36.7574	-0.989913	0.229871	-4.30638	1.65945e-05	0.00787625
ENSG00000011052.21	ENSG00000011052	NME1-NME2	Q32Q12	NME1-NME2 readthrough [Source:HGNC Symbol;Acc:HGNC:33531]	40.7223	-1.13934	0.312082	-3.65078	0.000261446	0.047735
ENSG00000185482.8	ENSG00000185482	STAC3	Q96MF2	SH3 and cysteine rich domain 3 [Source:HGNC Symbol;Acc:HGNC:28423]	163.821	-1.17829	0.276641	-4.25926	2.05109e-05	0.00922269
ENSG00000173826.15	ENSG00000173826	KCNH6	Q9H252	potassium voltage-gated channel subfamily H member 6 [Source:HGNC Symbol;Acc:HGNC:18862]	64.8309	-1.18541	0.242581	-4.88666	1.02564e-06	0.000657176
ENSG00000254518.1	ENSG00000254518			long intergenic non-protein coding RNA 2750 [Source:HGNC Symbol;Acc:HGNC:54269]	32.4046	-1.19877	0.329089	-3.64271	0.000269788	0.0486948
ENSG00000223343.1	ENSG00000223343			novel transcript	35.6224	-1.25562	0.326033	-3.85122	0.000117532	0.0286891
ENSG00000080572.13	ENSG00000080572	DNAAF6	Q9NQM4	dynein axonemal assembly factor 6 [Source:HGNC Symbol;Acc:HGNC:28570]	23.7947	-1.37601	0.362902	-3.7917	0.000149622	0.0336386
ENSG00000261221.4	ENSG00000261221	ZNF865	P0CJ78	zinc finger protein 865 [Source:HGNC Symbol;Acc:HGNC:38705]	272.331	-1.41882	0.383273	-3.70184	0.000214039	0.0431207
ENSG00000238097.2	ENSG00000238097			long intergenic non-protein coding RNA 2037 [Source:HGNC Symbol;Acc:HGNC:52877]	23.0704	-1.48104	0.362045	-4.09078	4.29934e-05	0.0158874
ENSG00000267629.3	ENSG00000267629			novel transcriptreadthrough between TM6SF2 and HAPLN4	12.524	-1.72589	0.417202	-4.13683	3.52137e-05	0.013885
ENSG00000236485.1	ENSG00000236485			long intergenic non-protein coding RNA 1945 [Source:HGNC Symbol;Acc:HGNC:52769]	29.6773	-1.84754	0.296501	-6.23113	4.63087e-10	4.56497e-07
ENSG00000287850.1	ENSG00000287850			novel transcript	7.44048	-2.09192	0.535237	-3.9084	9.29085e-05	0.0253324
ENSG00000280852.2	ENSG00000280852			adaptor-related protein complex 1sigma 2 subunit (AP1S2) pseudogene	25.0457	-2.11068	0.362255	-5.82649	5.66047e-09	5.00269e-06
ENSG00000277795.1	ENSG00000277795			novel zinc finger pseudogene	5.90631	-2.7108	0.712438	-3.80496	0.000141826	0.0324538

## Sheet: GO lipo control vs. lipo pdAT
GO.ID	Term	Annotated	Significant	Expected	Pval
GO:0060337	type I interferon signaling pathway	74	15	0.47	2.6e-21
GO:0051607	defense response to virus	210	24	1.34	1.3e-19
GO:0060333	interferon-gamma-mediated signaling path...	77	16	0.49	1.3e-19
GO:0045071	negative regulation of viral genome repl...	43	9	0.27	5.5e-12
GO:0002480	antigen processing and presentation of e...	8	4	0.05	1.1e-07
GO:0016032	viral process	846	29	5.38	3.6e-06
GO:0032020	ISG15-protein conjugation	6	3	0.04	4.9e-06
GO:0032480	negative regulation of type I interferon...	42	5	0.27	6.6e-06
GO:0002486	antigen processing and presentation of e...	7	3	0.04	8.6e-06
GO:1902187	negative regulation of viral release fro...	12	3	0.08	5.3e-05
GO:0046597	negative regulation of viral entry into ...	15	3	0.1	0.00011
GO:0035455	response to interferon-alpha	18	3	0.11	0.00019
GO:0032727	positive regulation of interferon-alpha ...	19	3	0.12	0.00022
GO:0045087	innate immune response	790	35	5.02	0.00024
GO:0006659	phosphatidylserine biosynthetic process	4	2	0.03	0.00024
GO:0001916	positive regulation of T cell mediated c...	24	3	0.15	0.00046
GO:0042270	protection from natural killer cell medi...	6	2	0.04	0.00059
GO:0002479	antigen processing and presentation of e...	62	4	0.39	0.00065
GO:0035456	response to interferon-beta	24	4	0.15	0.00105
GO:0003374	dynamin family protein polymerization in...	8	2	0.05	0.00109
GO:0016185	synaptic vesicle budding from presynapti...	8	2	0.05	0.00109
GO:0039530	MDA-5 signaling pathway	9	2	0.06	0.0014
GO:0050803	regulation of synapse structure or activ...	191	3	1.21	0.00175
GO:0019985	translesion synthesis	41	3	0.26	0.00223
GO:0071356	cellular response to tumor necrosis fact...	248	6	1.58	0.00313
GO:0032880	regulation of protein localization	777	11	4.94	0.00314
GO:0043123	positive regulation of I-kappaB kinase/N...	163	5	1.04	0.00383
GO:0098884	postsynaptic neurotransmitter receptor i...	16	2	0.1	0.00453
GO:0035458	cellular response to interferon-beta	16	2	0.1	0.00453
GO:0006511	ubiquitin-dependent protein catabolic pr...	574	8	3.65	0.00554
GO:0002622	regulation of B cell antigen processing ...	1	1	0.01	0.00636
GO:0000161	osmosensory signaling MAPK cascade	1	1	0.01	0.00636
GO:0003340	negative regulation of mesenchymal to ep...	1	1	0.01	0.00636
GO:0002481	antigen processing and presentation of e...	1	1	0.01	0.00636
GO:1902216	positive regulation of interleukin-4-med...	1	1	0.01	0.00636
GO:0046226	coumarin catabolic process	1	1	0.01	0.00636
GO:0060945	cardiac neuron differentiation	1	1	0.01	0.00636
GO:0046725	negative regulation by virus of viral pr...	1	1	0.01	0.00636
GO:0002737	negative regulation of plasmacytoid dend...	1	1	0.01	0.00636
GO:0072308	negative regulation of metanephric nephr...	1	1	0.01	0.00636
GO:0043318	negative regulation of cytotoxic T cell ...	1	1	0.01	0.00636
GO:0001811	negative regulation of type I hypersensi...	1	1	0.01	0.00636
GO:0001814	negative regulation of antibody-dependen...	1	1	0.01	0.00636
GO:0001815	positive regulation of antibody-dependen...	1	1	0.01	0.00636
GO:0050765	negative regulation of phagocytosis	20	2	0.13	0.00706
GO:0097191	extrinsic apoptotic signaling pathway	195	5	1.24	0.00818
GO:0051865	protein autoubiquitination	66	3	0.42	0.00854
GO:0006955	immune response	1767	41	11.24	0.0093
GO:0018215	protein phosphopantetheinylation	287	6	1.83	0.00996
GO:0002230	positive regulation of defense response ...	26	2	0.17	0.01178
GO:0002477	antigen processing and presentation of e...	3	2	0.02	0.01255
GO:0006655	phosphatidylglycerol biosynthetic proces...	8	2	0.05	0.01255
GO:0043331	response to dsRNA	39	2	0.25	0.01258
GO:0032613	interleukin-10 production	49	2	0.31	0.01258
GO:0034124	regulation of MyD88-dependent toll-like ...	2	1	0.01	0.01268
GO:0001579	medium-chain fatty acid transport	2	1	0.01	0.01268
GO:1904434	positive regulation of ferrous iron bind...	2	1	0.01	0.01268
GO:1904437	positive regulation of transferrin recep...	2	1	0.01	0.01268
GO:0032929	negative regulation of superoxide anion ...	2	1	0.01	0.01268
GO:0150074	positive regulation of protein-glutamine...	2	1	0.01	0.01268
GO:0002605	negative regulation of dendritic cell an...	2	1	0.01	0.01268
GO:0000117	regulation of transcription involved in ...	2	1	0.01	0.01268
GO:0071283	cellular response to iron(III) ion	2	1	0.01	0.01268
GO:2000978	negative regulation of forebrain neuron ...	2	1	0.01	0.01268
GO:0002316	follicular B cell differentiation	2	1	0.01	0.01268
GO:0016267	O-glycan processing, core 1	2	1	0.01	0.01268
GO:0032759	positive regulation of TRAIL production	2	1	0.01	0.01268
GO:0030683	mitigation of host immune response by vi...	2	1	0.01	0.01268
GO:1901253	negative regulation of intracellular tra...	2	1	0.01	0.01268
GO:0140039	cell-cell adhesion in response to extrac...	2	1	0.01	0.01268
GO:1905135	biotin import across plasma membrane	2	1	0.01	0.01268
GO:0010124	phenylacetate catabolic process	2	1	0.01	0.01268
GO:1902044	regulation of Fas signaling pathway	2	1	0.01	0.01268
GO:0034344	regulation of type III interferon produc...	2	1	0.01	0.01268
GO:0006227	dUDP biosynthetic process	2	1	0.01	0.01268
GO:0097274	urea homeostasis	2	1	0.01	0.01268
GO:0006233	dTDP biosynthetic process	2	1	0.01	0.01268
GO:1902631	negative regulation of membrane hyperpol...	2	1	0.01	0.01268
GO:1901666	positive regulation of NAD+ ADP-ribosylt...	2	1	0.01	0.01268
GO:0032728	positive regulation of interferon-beta p...	29	2	0.18	0.01453
GO:0045648	positive regulation of erythrocyte diffe...	30	2	0.19	0.01551
GO:1904646	cellular response to amyloid-beta	30	2	0.19	0.01551
GO:0071108	protein K48-linked deubiquitination	31	2	0.2	0.01651
GO:0043312	neutrophil degranulation	419	7	2.66	0.01735
GO:0060760	positive regulation of response to cytok...	47	3	0.3	0.01862
GO:0002519	natural killer cell tolerance induction	3	1	0.02	0.01896
GO:0072136	metanephric mesenchymal cell proliferati...	3	1	0.02	0.01896
GO:0090264	regulation of immune complex clearance b...	3	1	0.02	0.01896
GO:0021769	orbitofrontal cortex development	3	1	0.02	0.01896
GO:0002266	follicular dendritic cell activation	3	1	0.02	0.01896
GO:0090086	negative regulation of protein deubiquit...	3	1	0.02	0.01896
GO:0015835	peptidoglycan transport	3	1	0.02	0.01896
GO:2000566	positive regulation of CD8-positive, alp...	3	1	0.02	0.01896
GO:1902564	negative regulation of neutrophil activa...	3	1	0.02	0.01896
GO:2001226	negative regulation of chloride transpor...	3	1	0.02	0.01896
GO:0070236	negative regulation of activation-induce...	3	1	0.02	0.01896
GO:0051707	response to other organism	1260	43	8.01	0.01922
GO:0006513	protein monoubiquitination	63	3	0.4	0.01935
GO:0045824	negative regulation of innate immune res...	59	5	0.38	0.01962
GO:0006953	acute-phase response	36	2	0.23	0.02191
GO:0002819	regulation of adaptive immune response	147	6	0.93	0.02411
GO:0021762	substantia nigra development	38	2	0.24	0.02425
GO:0034165	positive regulation of toll-like recepto...	4	1	0.03	0.0252
GO:0072162	metanephric mesenchymal cell differentia...	4	1	0.03	0.0252
GO:0035616	histone H2B conserved C-terminal lysine ...	4	1	0.03	0.0252
GO:0010040	response to iron(II) ion	4	1	0.03	0.0252
GO:2000110	negative regulation of macrophage apopto...	4	1	0.03	0.0252
GO:1900069	regulation of cellular hyperosmotic sali...	4	1	0.03	0.0252
GO:0002476	antigen processing and presentation of e...	4	1	0.03	0.0252
GO:0070434	positive regulation of nucleotide-bindin...	4	1	0.03	0.0252
GO:0006235	dTTP biosynthetic process	4	1	0.03	0.0252
GO:0000266	mitochondrial fission	42	2	0.27	0.02922
GO:0042149	cellular response to glucose starvation	43	2	0.27	0.03052
GO:2001198	regulation of dendritic cell differentia...	11	2	0.07	0.03108
GO:0046902	regulation of mitochondrial membrane per...	62	2	0.39	0.03119
GO:0034157	positive regulation of toll-like recepto...	5	1	0.03	0.0314
GO:2000373	positive regulation of DNA topoisomerase...	5	1	0.03	0.0314
GO:0140206	dipeptide import across plasma membrane	5	1	0.03	0.0314
GO:1904293	negative regulation of ERAD pathway	5	1	0.03	0.0314
GO:1903298	negative regulation of hypoxia-induced i...	5	1	0.03	0.0314
GO:0009597	detection of virus	5	1	0.03	0.0314
GO:0071072	negative regulation of phospholipid bios...	5	1	0.03	0.0314
GO:0032819	positive regulation of natural killer ce...	5	1	0.03	0.0314
GO:2000051	negative regulation of non-canonical Wnt...	5	1	0.03	0.0314
GO:0022614	membrane to membrane docking	5	1	0.03	0.0314
GO:0006101	citrate metabolic process	5	1	0.03	0.0314
GO:0044381	glucose import in response to insulin st...	5	1	0.03	0.0314
GO:0006654	phosphatidic acid biosynthetic process	44	2	0.28	0.03184
GO:0032479	regulation of type I interferon producti...	115	9	0.73	0.03469
GO:0019941	modification-dependent protein catabolic...	580	9	3.69	0.0358
GO:0019885	antigen processing and presentation of e...	13	4	0.08	0.03641
GO:0034127	regulation of MyD88-independent toll-lik...	6	1	0.04	0.03756
GO:0033211	adiponectin-activated signaling pathway	6	1	0.04	0.03756
GO:0034756	regulation of iron ion transport	6	1	0.04	0.03756
GO:0051599	response to hydrostatic pressure	6	1	0.04	0.03756
GO:0032049	cardiolipin biosynthetic process	6	1	0.04	0.03756
GO:2001199	negative regulation of dendritic cell di...	6	1	0.04	0.03756
GO:0090521	glomerular visceral epithelial cell migr...	6	1	0.04	0.03756
GO:1990379	lipid transport across blood-brain barri...	6	1	0.04	0.03756
GO:0036016	cellular response to interleukin-3	6	1	0.04	0.03756
GO:0036018	cellular response to erythropoietin	6	1	0.04	0.03756
GO:0046826	negative regulation of protein export fr...	6	1	0.04	0.03756
GO:0051902	negative regulation of mitochondrial dep...	6	1	0.04	0.03756
GO:0043392	negative regulation of DNA binding	49	2	0.31	0.03879
GO:0072593	reactive oxygen species metabolic proces...	235	3	1.49	0.03892
GO:0051289	protein homotetramerization	50	2	0.32	0.04024
GO:0061025	membrane fusion	148	4	0.94	0.04353
GO:0002667	regulation of T cell anergy	7	1	0.04	0.04368
GO:0038113	interleukin-9-mediated signaling pathway	7	1	0.04	0.04368
GO:0038114	interleukin-21-mediated signaling pathwa...	7	1	0.04	0.04368
GO:0060336	negative regulation of interferon-gamma-...	7	1	0.04	0.04368
GO:1990034	calcium ion export across plasma membran...	7	1	0.04	0.04368
GO:0002924	negative regulation of humoral immune re...	7	1	0.04	0.04368
GO:0099527	postsynapse to nucleus signaling pathway	7	1	0.04	0.04368
GO:2000553	positive regulation of T-helper 2 cell c...	7	1	0.04	0.04368
GO:0050861	positive regulation of B cell receptor s...	7	1	0.04	0.04368
GO:0050859	negative regulation of B cell receptor s...	7	1	0.04	0.04368
GO:2000646	positive regulation of receptor cataboli...	7	1	0.04	0.04368
GO:0071219	cellular response to molecule of bacteri...	171	2	1.09	0.0437
GO:0016311	dephosphorylation	443	6	2.82	0.0479
GO:0002237	response to molecule of bacterial origin	291	5	1.85	0.04862
GO:0010498	proteasomal protein catabolic process	440	5	2.8	0.04911
GO:1990000	amyloid fibril formation	20	2	0.13	0.04929
GO:2000117	negative regulation of cysteine-type end...	70	2	0.45	0.04946
GO:1900246	positive regulation of RIG-I signaling p...	8	1	0.05	0.04977
GO:1902966	positive regulation of protein localizat...	8	1	0.05	0.04977
GO:0006651	diacylglycerol biosynthetic process	8	1	0.05	0.04977
GO:0034058	endosomal vesicle fusion	8	1	0.05	0.04977
GO:1902237	positive regulation of endoplasmic retic...	8	1	0.05	0.04977
GO:0002729	positive regulation of natural killer ce...	8	1	0.05	0.04977
GO:0070212	protein poly-ADP-ribosylation	8	1	0.05	0.04977
GO:0071316	cellular response to nicotine	8	1	0.05	0.04977
GO:0090647	modulation of age-related behavioral dec...	8	1	0.05	0.04977
GO:0070782	phosphatidylserine exposure on apoptotic...	8	1	0.05	0.04977
GO:0070936	protein K48-linked ubiquitination	58	2	0.37	0.05256
GO:0050776	regulation of immune response	793	17	5.04	0.05468
GO:0006072	glycerol-3-phosphate metabolic process	9	1	0.06	0.05581
GO:0010998	regulation of translational initiation b...	9	1	0.06	0.05581
GO:1905907	negative regulation of amyloid fibril fo...	9	1	0.06	0.05581
GO:1902033	regulation of hematopoietic stem cell pr...	9	1	0.06	0.05581
GO:0070292	N-acylphosphatidylethanolamine metabolic...	9	1	0.06	0.05581
GO:0010273	detoxification of copper ion	9	1	0.06	0.05581
GO:0035520	monoubiquitinated protein deubiquitinati...	9	1	0.06	0.05581
GO:0019043	establishment of viral latency	9	1	0.06	0.05581
GO:0051092	positive regulation of NF-kappaB transcr...	140	3	0.89	0.05984
GO:0006851	mitochondrial calcium ion transmembrane ...	22	2	0.14	0.06124
GO:1901387	positive regulation of voltage-gated cal...	10	1	0.06	0.06182
GO:1902950	regulation of dendritic spine maintenanc...	10	1	0.06	0.06182
GO:0015911	long-chain fatty acid import across plas...	10	1	0.06	0.06182
GO:0051561	positive regulation of mitochondrial cal...	10	1	0.06	0.06182
GO:0010917	negative regulation of mitochondrial mem...	10	1	0.06	0.06182
GO:0033689	negative regulation of osteoblast prolif...	10	1	0.06	0.06182
GO:0070106	interleukin-27-mediated signaling pathwa...	10	1	0.06	0.06182
GO:0031652	positive regulation of heat generation	10	1	0.06	0.06182
GO:0070757	interleukin-35-mediated signaling pathwa...	10	1	0.06	0.06182
GO:0070665	positive regulation of leukocyte prolife...	126	4	0.8	0.06621
GO:0001836	release of cytochrome c from mitochondri...	46	2	0.29	0.06725
GO:0010832	negative regulation of myotube different...	11	1	0.07	0.06779
GO:1900225	regulation of NLRP3 inflammasome complex...	11	1	0.07	0.06779
GO:0140289	protein mono-ADP-ribosylation	11	1	0.07	0.06779

## Sheet: KEGG lipo control vs. lipo pdAT
ID	Description	GeneRatio	BgRatio	pvalue	p.adjust	qvalue	geneID	Count
hsa05164	Influenza A	7	171/8142	1.9625e-05	0.0024335	0.0022104	3665/4599/4600/5610/64135/7706/91543	7
hsa05162	Measles	6	139/8142	6.11098e-05	0.00378881	0.00344145	2213/3665/4599/4600/5610/64135	6
hsa04622	RIG-I-like receptor signaling pathway	4	70/8142	0.000399157	0.0164985	0.0149859	3665/64135/7706/9636	4
hsa05160	Hepatitis C	5	157/8142	0.00107016	0.0331749	0.0301334	3665/4599/4600/5610/91543	5
hsa04621	NOD-like receptor signaling pathway	5	184/8142	0.00216239	0.046614	0.0423404	2633/2634/2635/3428/3665	5
hsa05167	Kaposi sarcoma-associated herpesvirus infection	5	194/8142	0.00272323	0.046614	0.0423404	3133/3665/5610/59345/83439	5
hsa05168	Herpes simplex virus 1 infection	8	495/8142	0.00283684	0.046614	0.0423404	121274/3133/3665/5610/567/64135/6672/684	8
hsa05169	Epstein-Barr virus infection	5	202/8142	0.00324287	0.046614	0.0423404	3133/3665/5610/567/9636	5
hsa05203	Viral carcinogenesis	5	204/8142	0.00338327	0.046614	0.0423404	3133/3665/5366/5610/6672	5
hsa03250	Viral life cycle - HIV-1	3	63/8142	0.00381736	0.0473353	0.0429955	4599/4600/684	3

## Sheet: DEG CF VZV vs. CF VZV + IFNa2
ensembl_gene_id_version	ensembl_gene_id	uniprot_gn_symbol	uniprot_gn_id	description	baseMean	log2FoldChange	lfcSE	stat	pvalue	padj
ENSG00000258384.1	ENSG00000258384			RCCD1 and UNC45A antisense RNA 1 [Source:HGNC Symbol;Acc:HGNC:54811]	11.2065	2.28607	0.591178	3.86698	0.000110191	0.0465502
ENSG00000117118.10	ENSG00000117118	SDHB	P21912	succinate dehydrogenase complex iron sulfur subunit B [Source:HGNC Symbol;Acc:HGNC:10681]	161.992	-0.802828	0.204704	-3.92189	8.78561e-05	0.040616
ENSG00000170581.14	ENSG00000170581	STAT2	R9QE65	signal transducer and activator of transcription 2 [Source:HGNC Symbol;Acc:HGNC:11363]	158.129	-0.882875	0.226113	-3.90457	9.43933e-05	0.0422505
ENSG00000105939.14	ENSG00000105939	ZC3HAV1	Q7Z2W4	zinc finger CCCH-type containingantiviral 1 [Source:HGNC Symbol;Acc:HGNC:23721]	368.275	-0.897921	0.211505	-4.24538	2.18222e-05	0.0118819
ENSG00000137628.18	ENSG00000137628	DDX60	Q8IY21	DExD/H-box helicase 60 [Source:HGNC Symbol;Acc:HGNC:25942]	197.365	-0.913306	0.209687	-4.35556	1.32724e-05	0.00855791
ENSG00000185880.13	ENSG00000185880	TRIM69	Q86WT6	tripartite motif containing 69 [Source:HGNC Symbol;Acc:HGNC:17857]	253.495	-0.965734	0.234874	-4.11172	3.92726e-05	0.0196379
ENSG00000121060.19	ENSG00000121060	TRIM25	Q14258	tripartite motif containing 25 [Source:HGNC Symbol;Acc:HGNC:12932]	140.943	-1.11024	0.259945	-4.27106	1.94544e-05	0.0110854
ENSG00000067066.17	ENSG00000067066	SP100	P23497	SP100 nuclear antigen [Source:HGNC Symbol;Acc:HGNC:11206]	206.745	-1.1491	0.295947	-3.88278	0.000103269	0.044391
ENSG00000173821.19	ENSG00000173821	RNF213	A0A0A0MTC1	ring finger protein 213 [Source:HGNC Symbol;Acc:HGNC:14539]	386.206	-1.20072	0.198355	-6.05339	1.41826e-09	1.93057e-06
ENSG00000100342.21	ENSG00000100342	APOL1	O14791	apolipoprotein L1 [Source:HGNC Symbol;Acc:HGNC:618]	28.4765	-1.27657	0.327039	-3.90343	9.48403e-05	0.0422505
ENSG00000138496.17	ENSG00000138496	PARP9	Q8IXQ6	poly(ADP-ribose) polymerase family member 9 [Source:HGNC Symbol;Acc:HGNC:24118]	155.741	-1.3241	0.318827	-4.15306	3.28064e-05	0.0171026
ENSG00000135899.19	ENSG00000135899	SP110	Q9HB58	SP110 nuclear body protein [Source:HGNC Symbol;Acc:HGNC:5401]	48.0155	-1.3847	0.316603	-4.37362	1.222e-05	0.0080923
ENSG00000156587.16	ENSG00000156587	UBE2L6	O14933	ubiquitin conjugating enzyme E2 L6 [Source:HGNC Symbol;Acc:HGNC:12490]	170.87	-1.43929	0.327376	-4.39643	1.10043e-05	0.00748967
ENSG00000002549.13	ENSG00000002549	LAP3	P28838	leucine aminopeptidase 3 [Source:HGNC Symbol;Acc:HGNC:18449]	58.3814	-1.48009	0.345076	-4.28918	1.79333e-05	0.0109851
ENSG00000166750.10	ENSG00000166750	SLFN5	Q08AF3	schlafen family member 5 [Source:HGNC Symbol;Acc:HGNC:28286]	241.254	-1.51555	0.356478	-4.25147	2.12371e-05	0.0118261
ENSG00000055332.19	ENSG00000055332	EIF2AK2	P19525	eukaryotic translation initiation factor 2 alpha kinase 2 [Source:HGNC Symbol;Acc:HGNC:9437]	813.039	-1.58967	0.372123	-4.27189	1.9382e-05	0.0110854
ENSG00000274290.3	ENSG00000274290	H2BC4	P62807	H2B clustered histone 6 [Source:HGNC Symbol;Acc:HGNC:4753]	396.611	-1.68402	0.380453	-4.42636	9.58357e-06	0.00670905
ENSG00000134326.12	ENSG00000134326	CMPK2	Q5EBM0	cytidine/uridine monophosphate kinase 2 [Source:HGNC Symbol;Acc:HGNC:27015]	47.9243	-1.84721	0.391185	-4.72209	2.33433e-06	0.0017332
ENSG00000163565.19	ENSG00000163565	IFI16	Q16666	interferon gamma inducible protein 16 [Source:HGNC Symbol;Acc:HGNC:5395]	461.606	-1.85748	0.429218	-4.3276	1.50745e-05	0.00947067
ENSG00000060491.17	ENSG00000060491	OGFR	Q9NZT2	opioid growth factor receptor [Source:HGNC Symbol;Acc:HGNC:15768]	85.3683	-1.88665	0.440639	-4.28162	1.85539e-05	0.0110854
ENSG00000021776.11	ENSG00000021776	AQR	O60306	aquarius intron-binding spliceosomal factor [Source:HGNC Symbol;Acc:HGNC:29513]	1168.31	-1.9717	0.480555	-4.10296	4.07896e-05	0.0199885
ENSG00000183486.14	ENSG00000183486	MX2	P20592	MX dynamin like GTPase 2 [Source:HGNC Symbol;Acc:HGNC:7533]	180.994	-1.9828	0.359959	-5.50842	3.62072e-08	3.16839e-05
ENSG00000173193.15	ENSG00000173193	PARP14	Q460N5	poly(ADP-ribose) polymerase family member 14 [Source:HGNC Symbol;Acc:HGNC:29232]	218.939	-2.02002	0.324229	-6.23023	4.65752e-10	6.71285e-07
ENSG00000108771.13	ENSG00000108771	DHX58	Q96C10	DExH-box helicase 58 [Source:HGNC Symbol;Acc:HGNC:29517]	25.9222	-2.06323	0.496217	-4.15792	3.21157e-05	0.0171026
ENSG00000026950.17	ENSG00000026950	BTN3A1	O00481	butyrophilin subfamily 3 member A1 [Source:HGNC Symbol;Acc:HGNC:1138]	144.734	-2.09374	0.373632	-5.60376	2.09749e-08	1.97664e-05
ENSG00000186470.14	ENSG00000186470	BTN3A2	P78410	butyrophilin subfamily 3 member A2 [Source:HGNC Symbol;Acc:HGNC:1139]	91.0238	-2.11018	0.288407	-7.31669	2.54159e-13	7.78427e-10
ENSG00000128335.14	ENSG00000128335	APOL2	A0A024R1M8	apolipoprotein L2 [Source:HGNC Symbol;Acc:HGNC:619]	50.9342	-2.14587	0.366379	-5.85697	4.71383e-09	5.24993e-06
ENSG00000108679.13	ENSG00000108679	LGALS3BP	Q08380	galectin 3 binding protein [Source:HGNC Symbol;Acc:HGNC:6564]	231.957	-2.18167	0.421608	-5.17464	2.2835e-07	0.000174845
ENSG00000138646.9	ENSG00000138646	HERC5	Q9UII4	HECT and RLD domain containing E3 ubiquitin protein ligase 5 [Source:HGNC Symbol;Acc:HGNC:24368]	217	-2.18876	0.309019	-7.08294	1.41128e-12	3.14356e-09
ENSG00000206337.12	ENSG00000206337			HLA complex P5 [Source:HGNC Symbol;Acc:HGNC:21659]	15.1411	-2.27778	0.560478	-4.064	4.8238e-05	0.0231751
ENSG00000132109.10	ENSG00000132109	TRIM21	P19474	tripartite motif containing 21 [Source:HGNC Symbol;Acc:HGNC:11312]	43.9411	-2.2926	0.589374	-3.88989	0.000100291	0.0438809
ENSG00000240065.8	ENSG00000240065	PSMB9	A2ACR1	proteasome 20S subunit beta 9 [Source:HGNC Symbol;Acc:HGNC:9546]	89.0259	-2.38325	0.340074	-7.00803	2.41693e-12	4.93497e-09
ENSG00000168961.17	ENSG00000168961	LGALS9	O00182	galectin 9 [Source:HGNC Symbol;Acc:HGNC:6570]	15.0871	-2.40041	0.5826	-4.12017	3.78588e-05	0.0193253
ENSG00000204264.12	ENSG00000204264	PSM8	X5CMJ9	proteasome 20S subunit beta 8 [Source:HGNC Symbol;Acc:HGNC:9545]	41.4134	-2.41756	0.464767	-5.20167	1.97511e-07	0.00015611
ENSG00000221963.6	ENSG00000221963	APOL6	Q9BWW8	apolipoprotein L6 [Source:HGNC Symbol;Acc:HGNC:14870]	71.025	-2.56703	0.359096	-7.14859	8.76757e-13	2.38692e-09
ENSG00000115267.9	ENSG00000115267	IFIH1	Q9BYX4	interferon induced with helicase C domain 1 [Source:HGNC Symbol;Acc:HGNC:18873]	61.1302	-2.58955	0.333709	-7.7599	8.49931e-15	2.975e-11
ENSG00000110446.12	ENSG00000110446	SLC15A3	F5H1C8	solute carrier family 15 member 3 [Source:HGNC Symbol;Acc:HGNC:18068]	24.6807	-2.83435	0.476633	-5.94661	2.73761e-09	3.53036e-06
ENSG00000134321.13	ENSG00000134321	RSAD2	Q8WXG1	radical S-adenosyl methionine domain containing 2 [Source:HGNC Symbol;Acc:HGNC:30908]	37.4875	-2.85911	0.509457	-5.61207	1.99916e-08	1.95933e-05
ENSG00000163840.10	ENSG00000163840	DTX3L	Q8TDB6	deltex E3 ubiquitin ligase 3L [Source:HGNC Symbol;Acc:HGNC:30323]	86.3124	-2.86635	0.416514	-6.88176	5.91193e-12	1.03467e-08
ENSG00000206503.13	ENSG00000206503	HLA-A	P04439	major histocompatibility complexclass IA [Source:HGNC Symbol;Acc:HGNC:4931]	81.7456	-2.90028	0.529689	-5.47543	4.36454e-08	3.68759e-05
ENSG00000204592.9	ENSG00000204592	HLA-E	P13747	major histocompatibility complexclass IE [Source:HGNC Symbol;Acc:HGNC:4962]	139.302	-2.93874	0.421722	-6.96843	3.2049e-12	6.0405e-09
ENSG00000111801.16	ENSG00000111801	BTN3A3	O00478	butyrophilin subfamily 3 member A3 [Source:HGNC Symbol;Acc:HGNC:1140]	38.5635	-2.94439	0.552179	-5.33231	9.6969e-08	7.91978e-05
ENSG00000270188.1	ENSG00000270188	MTRNR2L11	S4R3Y5	MT-RNR2 like 11 [Source:HGNC Symbol;Acc:HGNC:37168]	11.4468	-3.27957	0.81269	-4.03545	5.44972e-05	0.0256787
ENSG00000166710.21	ENSG00000166710	B2M	P61769	beta-2-microglobulin [Source:HGNC Symbol;Acc:HGNC:914]	3348.2	-3.56938	0.635678	-5.61508	1.96476e-08	1.95933e-05
ENSG00000160932.11	ENSG00000160932	LY6E	E5RGI6	lymphocyte antigen 6 family member E [Source:HGNC Symbol;Acc:HGNC:6727]	168.114	-3.71721	0.839406	-4.42838	9.49437e-06	0.00670905
ENSG00000130589.16	ENSG00000130589	HELZ2	Q9BYK8	helicase with zinc finger 2 [Source:HGNC Symbol;Acc:HGNC:30021]	299.457	-3.74951	0.675319	-5.55221	2.82079e-08	2.55982e-05
ENSG00000188313.13	ENSG00000188313	PLSCR1	O15162	phospholipid scramblase 1 [Source:HGNC Symbol;Acc:HGNC:9092]	306.327	-3.80025	0.386241	-9.83906	7.64232e-23	6.24174e-19
ENSG00000115415.20	ENSG00000115415	STAT1	A0A669KB68	signal transducer and activator of transcription 1 [Source:HGNC Symbol;Acc:HGNC:11362]	843.909	-3.88517	0.453007	-8.57639	9.78969e-18	4.79734e-14
ENSG00000204525.17	ENSG00000204525	HLA-C	Q5RIP0	major histocompatibility complexclass IC [Source:HGNC Symbol;Acc:HGNC:4933]	580.873	-4.00484	0.447106	-8.95725	3.3289e-19	2.03911e-15
ENSG00000234745.13	ENSG00000234745	HLA-B	Q5SS57	major histocompatibility complexclass IB [Source:HGNC Symbol;Acc:HGNC:4932]	1017.57	-4.21656	0.506087	-8.3317	7.9689e-17	3.25423e-13
ENSG00000137959.17	ENSG00000137959	IFI44L	Q53G44	interferon induced protein 44 like [Source:HGNC Symbol;Acc:HGNC:17817]	588.749	-4.48262	0.790066	-5.67373	1.3972e-08	1.48845e-05
ENSG00000238015.2	ENSG00000238015			ribosomal protein L23 (RPL23) pseudogene	11.9286	-4.54707	0.773327	-5.87988	4.10552e-09	4.79017e-06
ENSG00000157601.15	ENSG00000157601	MX1	P20591	MX dynamin like GTPase 1 [Source:HGNC Symbol;Acc:HGNC:7532]	341.98	-4.65581	0.367328	-12.6748	8.15585e-37	1.99835e-32
ENSG00000137965.11	ENSG00000137965	IFI44	Q8TCB0	interferon induced protein 44 [Source:HGNC Symbol;Acc:HGNC:16938]	156.98	-4.8363	0.765537	-6.31752	2.65787e-10	4.34154e-07
ENSG00000205413.8	ENSG00000205413	SAMD9	Q5K651	sterile alpha motif domain containing 9 [Source:HGNC Symbol;Acc:HGNC:1348]	108.419	-5.23124	0.837431	-6.24677	4.19017e-10	6.41672e-07
ENSG00000130303.14	ENSG00000130303	BST2	Q10589	bone marrow stromal cell antigen 2 [Source:HGNC Symbol;Acc:HGNC:1119]	273.082	-5.27197	0.740891	-7.11572	1.1133e-12	2.7278e-09
ENSG00000187608.10	ENSG00000187608	ISG15	P05161	ISG15 ubiquitin like modifier [Source:HGNC Symbol;Acc:HGNC:4053]	1050.24	-5.56914	0.510162	-10.9164	9.62135e-28	1.17871e-23
ENSG00000165949.12	ENSG00000165949	IFI27	P40305	interferon alpha inducible protein 27 [Source:HGNC Symbol;Acc:HGNC:5397]	1939.37	-6.31705	1.07403	-5.88165	4.06191e-09	4.79017e-06
ENSG00000204642.14	ENSG00000204642	HLA-F	P30511	major histocompatibility complexclass IF [Source:HGNC Symbol;Acc:HGNC:4963]	22.0442	-7.39018	1.92056	-3.84793	0.000119118	0.0494684

## Sheet: GO CF VZV vs. CF VZV + IFNa2
GO.ID	Term	Annotated	Significant	Expected	Pval
GO:0060337	type I interferon signaling pathway	73	15	0.27	6.3e-23
GO:0002480	antigen processing and presentation of e...	7	6	0.03	1.4e-14
GO:0051607	defense response to virus	213	19	0.8	1.7e-14
GO:0060333	interferon-gamma-mediated signaling path...	76	12	0.28	1.7e-13
GO:0045071	negative regulation of viral genome repl...	41	8	0.15	2e-12
GO:0002486	antigen processing and presentation of e...	6	5	0.02	3.6e-12
GO:0002479	antigen processing and presentation of e...	61	8	0.23	5.7e-11
GO:0016032	viral process	846	27	3.16	2.9e-10
GO:0032480	negative regulation of type I interferon...	43	6	0.16	1.1e-08
GO:0001916	positive regulation of T cell mediated c...	24	5	0.09	2.5e-08
GO:0045087	innate immune response	804	34	3.01	3.6e-07
GO:0042270	protection from natural killer cell medi...	5	3	0.02	4.9e-07
GO:0032020	ISG15-protein conjugation	6	3	0.02	9.8e-07
GO:0002477	antigen processing and presentation of e...	3	3	0.01	1.3e-05
GO:0035455	response to interferon-alpha	17	3	0.06	3.2e-05
GO:2000566	positive regulation of CD8-positive, alp...	3	2	0.01	4.1e-05
GO:0002519	natural killer cell tolerance induction	3	2	0.01	4.1e-05
GO:1900245	positive regulation of MDA-5 signaling p...	3	2	0.01	4.1e-05
GO:0002476	antigen processing and presentation of e...	3	2	0.01	4.1e-05
GO:0050852	T cell receptor signaling pathway	180	6	0.67	5.5e-05
GO:0032609	interferon-gamma production	96	5	0.36	7.4e-05
GO:0001817	regulation of cytokine production	625	21	2.34	8e-05
GO:0000209	protein polyubiquitination	309	9	1.16	0.00012
GO:0002230	positive regulation of defense response ...	27	3	0.1	0.00014
GO:0045824	negative regulation of innate immune res...	58	9	0.22	0.00021
GO:0035456	response to interferon-beta	23	4	0.09	0.00027
GO:0002729	positive regulation of natural killer ce...	7	2	0.03	0.00028
GO:0003374	dynamin family protein polymerization in...	8	2	0.03	0.00038
GO:0016185	synaptic vesicle budding from presynapti...	8	2	0.03	0.00038
GO:1900246	positive regulation of RIG-I signaling p...	8	2	0.03	0.00038
GO:0019985	translesion synthesis	41	3	0.15	0.00048
GO:0002456	T cell mediated immunity	87	8	0.33	0.00071
GO:0046598	positive regulation of viral entry into ...	11	2	0.04	0.00074
GO:0032736	positive regulation of interleukin-13 pr...	11	2	0.04	0.00074
GO:0140289	protein mono-ADP-ribosylation	11	2	0.04	0.00074
GO:0019731	antibacterial humoral response	49	3	0.18	0.00081
GO:0002726	positive regulation of T cell cytokine p...	19	3	0.07	0.00085
GO:1902187	negative regulation of viral release fro...	12	2	0.04	0.00088
GO:2001034	positive regulation of double-strand bre...	14	2	0.05	0.00121
GO:0035563	positive regulation of chromatin binding	14	2	0.05	0.00121
GO:0000266	mitochondrial fission	42	3	0.16	0.00135
GO:0046597	negative regulation of viral entry into ...	15	2	0.06	0.0014
GO:0098884	postsynaptic neurotransmitter receptor i...	16	2	0.06	0.00159
GO:0016045	detection of bacterium	16	2	0.06	0.00159
GO:0035458	cellular response to interferon-beta	16	2	0.06	0.00159
GO:0010499	proteasomal ubiquitin-independent protei...	17	2	0.06	0.0018
GO:0051092	positive regulation of NF-kappaB transcr...	140	4	0.52	0.00184
GO:0051865	protein autoubiquitination	66	3	0.25	0.00192
GO:1902036	regulation of hematopoietic stem cell di...	68	3	0.25	0.00209
GO:0007259	receptor signaling pathway via JAK-STAT	124	4	0.46	0.00213
GO:0032727	positive regulation of interferon-alpha ...	20	2	0.07	0.0025
GO:0032760	positive regulation of tumor necrosis fa...	73	3	0.27	0.00256
GO:0043123	positive regulation of I-kappaB kinase/N...	163	4	0.61	0.0032
GO:0050830	defense response to Gram-positive bacter...	81	3	0.3	0.00344
GO:0032753	positive regulation of interleukin-4 pro...	24	2	0.09	0.0036
GO:0046725	negative regulation by virus of viral pr...	1	1	0	0.00374
GO:0002737	negative regulation of plasmacytoid dend...	1	1	0	0.00374
GO:0003340	negative regulation of mesenchymal to ep...	1	1	0	0.00374
GO:0043322	negative regulation of natural killer ce...	1	1	0	0.00374
GO:0001815	positive regulation of antibody-dependen...	1	1	0	0.00374
GO:0002481	antigen processing and presentation of e...	1	1	0	0.00374
GO:0002485	antigen processing and presentation of e...	1	1	0	0.00374
GO:0072308	negative regulation of metanephric nephr...	1	1	0	0.00374
GO:0032834	positive regulation of CD4-positive, CD2...	1	1	0	0.00374
GO:1902216	positive regulation of interleukin-4-med...	1	1	0	0.00374
GO:0070241	positive regulation of activated T cell ...	1	1	0	0.00374
GO:0032728	positive regulation of interferon-beta p...	30	2	0.11	0.00559
GO:0045648	positive regulation of erythrocyte diffe...	30	2	0.11	0.00559
GO:0006513	protein monoubiquitination	63	3	0.24	0.00692
GO:0006953	acute-phase response	34	2	0.13	0.00714
GO:0032613	interleukin-10 production	49	2	0.18	0.00735
GO:1904434	positive regulation of ferrous iron bind...	2	1	0.01	0.00746
GO:1904437	positive regulation of transferrin recep...	2	1	0.01	0.00746
GO:0002728	negative regulation of natural killer ce...	2	1	0.01	0.00746
GO:2000568	positive regulation of memory T cell act...	2	1	0.01	0.00746
GO:0071283	cellular response to iron(III) ion	2	1	0.01	0.00746
GO:0032759	positive regulation of TRAIL production	2	1	0.01	0.00746
GO:1901666	positive regulation of NAD+ ADP-ribosylt...	2	1	0.01	0.00746
GO:1902044	regulation of Fas signaling pathway	2	1	0.01	0.00746
GO:0030683	mitigation of host immune response by vi...	2	1	0.01	0.00746
GO:0006227	dUDP biosynthetic process	2	1	0.01	0.00746
GO:0006233	dTDP biosynthetic process	2	1	0.01	0.00746
GO:1901253	negative regulation of intracellular tra...	2	1	0.01	0.00746
GO:2000978	negative regulation of forebrain neuron ...	2	1	0.01	0.00746
GO:0042157	lipoprotein metabolic process	114	3	0.43	0.00889
GO:0006955	immune response	1785	39	6.67	0.0095
GO:0039530	MDA-5 signaling pathway	9	3	0.03	0.01078
GO:2000116	regulation of cysteine-type endopeptidas...	202	3	0.76	0.01092
GO:0050798	activated T cell proliferation	38	2	0.14	0.011
GO:0045893	positive regulation of transcription, DN...	1409	9	5.27	0.01115
GO:0015835	peptidoglycan transport	3	1	0.01	0.01118
GO:0034344	regulation of type III interferon produc...	3	1	0.01	0.01118
GO:0090086	negative regulation of protein deubiquit...	3	1	0.01	0.01118
GO:0002419	T cell mediated cytotoxicity directed ag...	3	1	0.01	0.01118
GO:2001190	positive regulation of T cell activation...	3	1	0.01	0.01118
GO:0072136	metanephric mesenchymal cell proliferati...	3	1	0.01	0.01118
GO:0032880	regulation of protein localization	777	7	2.91	0.01276
GO:0032731	positive regulation of interleukin-1 bet...	48	2	0.18	0.01388
GO:0052548	regulation of endopeptidase activity	346	5	1.29	0.01414
GO:0060760	positive regulation of response to cytok...	49	3	0.18	0.01439
GO:0032649	regulation of interferon-gamma productio...	92	3	0.34	0.01443
GO:0043392	negative regulation of DNA binding	49	2	0.18	0.01443
GO:0060135	maternal process involved in female preg...	49	2	0.18	0.01443
GO:0043367	CD4-positive, alpha-beta T cell differen...	67	2	0.25	0.01467
GO:2001200	positive regulation of dendritic cell di...	4	1	0.01	0.01488
GO:0043323	positive regulation of natural killer ce...	4	1	0.01	0.01488
GO:0006659	phosphatidylserine biosynthetic process	4	1	0.01	0.01488
GO:2000670	positive regulation of dendritic cell ap...	4	1	0.01	0.01488
GO:0070434	positive regulation of nucleotide-bindin...	4	1	0.01	0.01488
GO:0034165	positive regulation of toll-like recepto...	4	1	0.01	0.01488
GO:0006105	succinate metabolic process	4	1	0.01	0.01488
GO:0039534	negative regulation of MDA-5 signaling p...	4	1	0.01	0.01488
GO:0006235	dTTP biosynthetic process	4	1	0.01	0.01488
GO:0072162	metanephric mesenchymal cell differentia...	4	1	0.01	0.01488
GO:0006521	regulation of cellular amino acid metabo...	50	2	0.19	0.015
GO:0042531	positive regulation of tyrosine phosphor...	51	2	0.19	0.01557
GO:2000272	negative regulation of signaling recepto...	52	2	0.19	0.01616
GO:0061025	membrane fusion	149	3	0.56	0.01639
GO:0050688	regulation of defense response to virus	58	5	0.22	0.0173
GO:0033209	tumor necrosis factor-mediated signaling...	150	3	0.56	0.01854
GO:2000373	positive regulation of DNA topoisomerase...	5	1	0.02	0.01856
GO:2000563	positive regulation of CD4-positive, alp...	5	1	0.02	0.01856
GO:2000510	positive regulation of dendritic cell ch...	5	1	0.02	0.01856
GO:0140206	dipeptide import across plasma membrane	5	1	0.02	0.01856
GO:0032819	positive regulation of natural killer ce...	5	1	0.02	0.01856
GO:0034157	positive regulation of toll-like recepto...	5	1	0.02	0.01856
GO:2000051	negative regulation of non-canonical Wnt...	5	1	0.02	0.01856
GO:0032729	positive regulation of interferon-gamma ...	57	2	0.21	0.01922
GO:0070936	protein K48-linked ubiquitination	58	2	0.22	0.01986
GO:1901224	positive regulation of NIK/NF-kappaB sig...	58	2	0.22	0.01986
GO:0019941	modification-dependent protein catabolic...	579	8	2.17	0.02024
GO:0019885	antigen processing and presentation of e...	12	6	0.04	0.02027
GO:2001198	regulation of dendritic cell differentia...	10	2	0.04	0.02184
GO:0033003	regulation of mast cell activation	37	2	0.14	0.02188
GO:0034756	regulation of iron ion transport	6	1	0.02	0.02223
GO:0046826	negative regulation of protein export fr...	6	1	0.02	0.02223
GO:0009597	detection of virus	6	1	0.02	0.02223
GO:0043305	negative regulation of mast cell degranu...	6	1	0.02	0.02223
GO:0060335	positive regulation of interferon-gamma-...	6	1	0.02	0.02223
GO:0032479	regulation of type I interferon producti...	117	9	0.44	0.02239
GO:0009617	response to bacterium	550	10	2.06	0.02308
GO:0038061	NIK/NF-kappaB signaling	146	4	0.55	0.02386
GO:2000553	positive regulation of T-helper 2 cell c...	7	1	0.03	0.02589
GO:2000646	positive regulation of receptor cataboli...	7	1	0.03	0.02589
GO:0038114	interleukin-21-mediated signaling pathwa...	7	1	0.03	0.02589
GO:0002667	regulation of T cell anergy	7	1	0.03	0.02589
GO:0060336	negative regulation of interferon-gamma-...	7	1	0.03	0.02589
GO:0039536	negative regulation of RIG-I signaling p...	7	1	0.03	0.02589
GO:0006511	ubiquitin-dependent protein catabolic pr...	573	7	2.14	0.02591
GO:0061418	regulation of transcription from RNA pol...	68	2	0.25	0.02673
GO:0032092	positive regulation of protein binding	79	3	0.3	0.02803
GO:0002237	response to molecule of bacterial origin	293	3	1.1	0.02904
GO:0070782	phosphatidylserine exposure on apoptotic...	8	1	0.03	0.02953
GO:0002725	negative regulation of T cell cytokine p...	8	1	0.03	0.02953
GO:0090647	modulation of age-related behavioral dec...	8	1	0.03	0.02953
GO:0051838	cytolysis by host of symbiont cells	8	1	0.03	0.02953
GO:0038113	interleukin-9-mediated signaling pathway	8	1	0.03	0.02953
GO:0071316	cellular response to nicotine	8	1	0.03	0.02953
GO:0034058	endosomal vesicle fusion	8	1	0.03	0.02953
GO:0070212	protein poly-ADP-ribosylation	8	1	0.03	0.02953
GO:1902966	positive regulation of protein localizat...	8	1	0.03	0.02953
GO:0045953	negative regulation of natural killer ce...	15	5	0.06	0.03084
GO:0031145	anaphase-promoting complex-dependent cat...	75	2	0.28	0.03202
GO:0032755	positive regulation of interleukin-6 pro...	76	2	0.28	0.03281
GO:2000562	negative regulation of CD4-positive, alp...	9	1	0.03	0.03316
GO:1902033	regulation of hematopoietic stem cell pr...	9	1	0.03	0.03316
GO:0010998	regulation of translational initiation b...	9	1	0.03	0.03316
GO:1900182	positive regulation of protein localizat...	77	2	0.29	0.0336
GO:0060334	regulation of interferon-gamma-mediated ...	23	3	0.09	0.03552
GO:0070757	interleukin-35-mediated signaling pathwa...	10	1	0.04	0.03678
GO:0038003	opioid receptor signaling pathway	10	1	0.04	0.03678
GO:0033689	negative regulation of osteoblast prolif...	10	1	0.04	0.03678
GO:0070106	interleukin-27-mediated signaling pathwa...	10	1	0.04	0.03678
GO:2000774	positive regulation of cellular senescen...	10	1	0.04	0.03678
GO:0031146	SCF-dependent proteasomal ubiquitin-depe...	83	2	0.31	0.03853
GO:0070665	positive regulation of leukocyte prolife...	127	4	0.47	0.03855
GO:0010972	negative regulation of G2/M transition o...	84	2	0.31	0.03938
GO:0071639	positive regulation of monocyte chemotac...	11	1	0.04	0.04039
GO:2001269	positive regulation of cysteine-type end...	11	1	0.04	0.04039
GO:0060368	regulation of Fc receptor mediated stimu...	11	1	0.04	0.04039
GO:0042532	negative regulation of tyrosine phosphor...	11	1	0.04	0.04039
GO:0046940	nucleoside monophosphate phosphorylation	12	1	0.04	0.04398
GO:0034356	NAD biosynthesis via nicotinamide ribosi...	12	1	0.04	0.04398
GO:1900225	regulation of NLRP3 inflammasome complex...	12	1	0.04	0.04398
GO:0032897	negative regulation of viral transcripti...	12	1	0.04	0.04398
GO:0033523	histone H2B ubiquitination	12	1	0.04	0.04398
GO:0034341	response to interferon-gamma	162	14	0.61	0.04542
GO:0070498	interleukin-1-mediated signaling pathway	93	2	0.35	0.04732
GO:1900121	negative regulation of receptor binding	13	1	0.05	0.04755
GO:0097202	activation of cysteine-type endopeptidas...	13	1	0.05	0.04755
GO:0046007	negative regulation of activated T cell ...	13	1	0.05	0.04755
GO:0045646	regulation of erythrocyte differentiatio...	44	3	0.16	0.04943
GO:0060071	Wnt signaling pathway, planar cell polar...	99	2	0.37	0.0529
GO:0045954	positive regulation of natural killer ce...	19	2	0.07	0.05373
GO:0016579	protein deubiquitination	245	4	0.92	0.05414
GO:0051444	negative regulation of ubiquitin-protein...	15	1	0.06	0.05467
GO:0071360	cellular response to exogenous dsRNA	15	1	0.06	0.05467
GO:0044827	modulation by host of viral genome repli...	15	1	0.06	0.05467
GO:0006978	DNA damage response, signal transduction...	15	1	0.06	0.05467
GO:1905820	positive regulation of chromosome separa...	16	1	0.06	0.05821

## Sheet: KEGG CF VZV vs. CF VZV + IFNa2
ID	Description	GeneRatio	BgRatio	pvalue	p.adjust	qvalue	geneID	Count
hsa05203	Viral carcinogenesis	11	204/8142	1.01958e-10	6.11749e-09	3.64903e-09	3017/3105/3133/3134/5610/6672/8339/8343/8344/8346/8347	11
hsa05322	Systemic lupus erythematosus	7	136/8142	5.84887e-07	1.75466e-05	1.04664e-05	3017/6737/8339/8343/8344/8346/8347	7
hsa05164	Influenza A	7	171/8142	2.73988e-06	5.47975e-05	3.26863e-05	4599/4600/5610/64135/6773/7706/91543	7
hsa05169	Epstein-Barr virus infection	7	202/8142	8.26774e-06	0.000124016	7.39745e-05	3105/3133/3134/5610/567/6773/9636	7
hsa05165	Human papillomavirus infection	8	331/8142	2.38114e-05	0.000285737	0.000170439	3105/3133/3134/4599/4600/5610/6773/9636	8
hsa05034	Alcoholism	6	187/8142	6.18124e-05	0.000506645	0.000302209	3017/8339/8343/8344/8346/8347	6
hsa05168	Herpes simplex virus 1 infection	9	495/8142	6.37052e-05	0.000506645	0.000302209	3105/3133/3134/5610/567/64135/6672/6773/684	9
hsa04613	Neutrophil extracellular trap formation	6	190/8142	6.75526e-05	0.000506645	0.000302209	3017/8339/8343/8344/8346/8347	6
hsa04622	RIG-I-like receptor signaling pathway	4	70/8142	0.000132312	0.000882083	0.000526155	64135/7706/79132/9636	4
hsa05162	Measles	5	139/8142	0.00016038	0.000962279	0.000573991	4599/4600/5610/64135/6773	5
hsa04612	Antigen processing and presentation	4	78/8142	0.000201513	0.00101567	0.00060584	3105/3133/3134/567	4
hsa05171	Coronavirus disease - COVID-19	6	232/8142	0.000203134	0.00101567	0.00060584	4599/4600/5610/64135/6773/9636	6
hsa05160	Hepatitis C	5	157/8142	0.000283344	0.00130774	0.000780058	4599/4600/5610/6773/91543	5
hsa05330	Allograft rejection	3	38/8142	0.00038527	0.00165116	0.0009849	3105/3133/3134	3
hsa05332	Graft-versus-host disease	3	42/8142	0.000518914	0.00207565	0.00123811	3105/3133/3134	3
hsa04940	Type I diabetes mellitus	3	43/8142	0.000556397	0.00208649	0.00124457	3105/3133/3134	3
hsa05167	Kaposi sarcoma-associated herpesvirus infection	5	194/8142	0.000748476	0.00264168	0.00157574	3105/3133/3134/5610/6773	5
hsa05320	Autoimmune thyroid disease	3	53/8142	0.00102932	0.00343108	0.00204661	3105/3133/3134	3
hsa05170	Human immunodeficiency virus 1 infection	5	212/8142	0.00111646	0.00352565	0.00210302	3105/3133/3134/567/684	5
hsa05416	Viral myocarditis	3	60/8142	0.00147677	0.0044303	0.00264264	3105/3133/3134	3
hsa03250	Viral life cycle - HIV-1	3	63/8142	0.00170056	0.00485875	0.0028982	4599/4600/684	3
hsa05166	Human T-cell leukemia virus 1 infection	4	222/8142	0.00949843	0.0259048	0.015452	3105/3133/3134/567	4
hsa05163	Human cytomegalovirus infection	4	225/8142	0.00994675	0.025948	0.0154778	3105/3133/3134/567	4
hsa04514	Cell adhesion molecules	3	149/8142	0.0185621	0.0464054	0.0276804	3105/3133/3134	3
hsa04145	Phagosome	3	152/8142	0.0195637	0.0469529	0.028007	3105/3133/3134	3
hsa04218	Cellular senescence	3	156/8142	0.0209453	0.0483354	0.0288317	3105/3133/3134	3
